# Supplementary material for: A novel caspase 8 selective small molecule potentiates TRAIL-induced cell death
Source: PubMed Central journal article supplement (PMC4426715; doi:10.1038/srep09893), 2015-05-11
Supplement: srep09893-s1.pdf [file srep09893-s1.pdf]

## Supplementary Figures

### A novel caspase 8 selective small molecule potentiates TRAIL-induced cell death

Octavian Bucur<sup>1,4,\*</sup>, Gabriel Gaidos<sup>2,\*</sup>, Achani Yatawara<sup>2,\*</sup>, Bodvael Pennarun<sup>1</sup>, Chamila Rupasinghe<sup>2</sup>, Jérémie Roux<sup>3</sup>, Stefan Andrei<sup>1</sup>, Bingqian Guo<sup>2</sup>, Alexandra Panaitiu<sup>2</sup>, Maria Pellegrini<sup>2</sup>, Dale F. Mierke<sup>2#</sup>, Roya Khosravi-Far<sup>1,5#</sup>

<sup>1</sup>Department of Pathology, Beth Israel Deaconess Medical Center and Harvard Medical School, Boston, MA, USA;

<sup>2</sup>Department of Chemistry, Dartmouth College, Hanover, NH, USA;

<sup>3</sup>Department of Systems Biology, Harvard Medical School, Boston, MA, USA;

<sup>4</sup>Institute of Biochemistry of the Romanian Academy, Bucharest, Romania;

<sup>5</sup>Department of Biological and Biomedical Sciences Program, Harvard Medical School, Boston, MA, USA

\*These authors contributed equally to this work

#Corresponding authors:

*Roya Khosravi-Far, PhD*, Department of Pathology, Beth Israel Deaconess Medical Center and Harvard Medical School, 330 Brookline Avenue, Boston, MA 02215, USA; E-mail: rkhosrav@gmail.com

*Dale F. Mierke, PhD*, Chair, Department of Chemistry, Dartmouth College, 6128 Burke Hall, Hanover, NH 03755, USA. E-mail: dale.mierke@dartmouth.edu

A

## STD-NMR binding results

| Target                           | Compound 1                                                                        | Compound 2                                                                        | Compound 3                                                                         | Compound 4                                                                          |
|----------------------------------|-----------------------------------------------------------------------------------|-----------------------------------------------------------------------------------|------------------------------------------------------------------------------------|-------------------------------------------------------------------------------------|
|                                  | 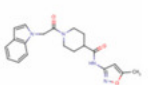 |  |  |  |
| <b>Caspase 8</b>                 | + v. small                                                                        | <b>broadening</b><br>(see Figure 2)                                               | -                                                                                  | -                                                                                   |
| <b>cFLIP</b>                     | -                                                                                 | -                                                                                 | -                                                                                  | -                                                                                   |
| <b>DR5</b>                       | <b>+ small</b><br>(see Suppl. Fig 1B)                                             | -                                                                                 | + v.v. small                                                                       | <b>+ small</b><br>(see Suppl. Fig 1C)                                               |
| <b>FADD 4.8<math>\mu</math>M</b> | -                                                                                 | -                                                                                 | -                                                                                  | N/A                                                                                 |
| <b>FADD 5.7<math>\mu</math>M</b> | -                                                                                 | + v.v. small                                                                      | -                                                                                  | + almost nothing                                                                    |
| <b>GST (Ctrl)</b>                | -                                                                                 | -                                                                                 | N/A                                                                                | -                                                                                   |

B

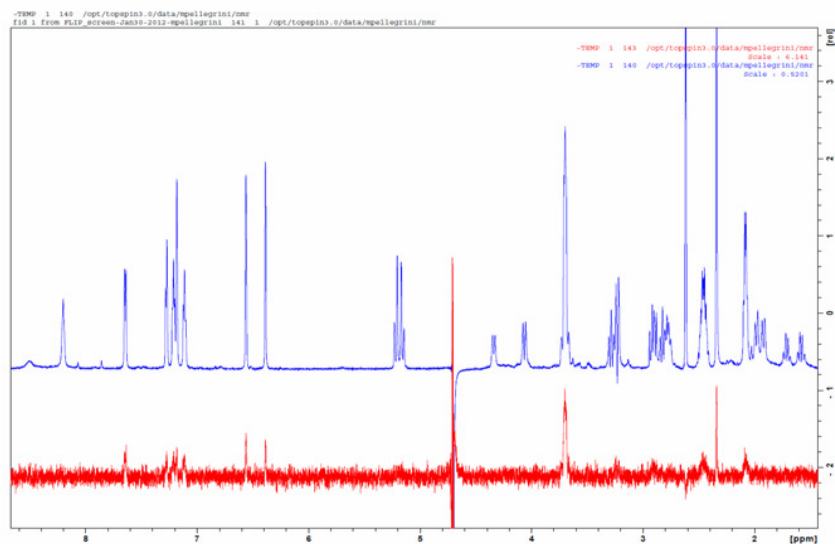

DR5 + C1

Blue: reference spectrum, C1 + DR5

Red: STD difference spectrum

C

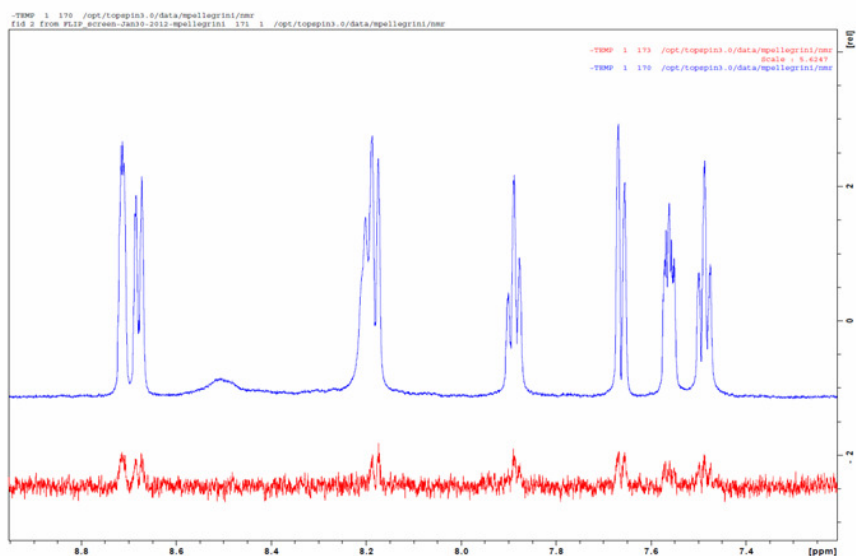

DR5 + C4  
Blue: reference spectrum, C4 +  
DR5  
Red: STD difference spectrum

### Supplementary Figure 1. Binding potential of C1-C4 small molecules to Caspase 8, DR5, FADD and cFLIP

**A.** A summary of the binding potential of C1-C4 compounds to Caspase 8, DR5, FADD and cFLIP is presented. STD-NMR experiments were performed as described in the Material and Methods section of the manuscript. Saturation transfer from the protein to the bound small molecules causes a decrease in the intensity of the small molecule resonances, which is detected as residual signal in a difference spectrum. These experiments confirm that small molecule compound 2 directly binds caspase 8, as determined by the STD-NMR experiments, while compound 1 may also bind caspase 8, but with low affinity.

**B.&C.** Compounds C1 and C4 have some affinity towards binding DR5. Line broadening is not observed in the control experiments in the presence of GST or buffer alone;  
“+ *v. small*” – very small broadening; “*v. v. small*” – very very small broadening; “-” – no broadening (no binding)

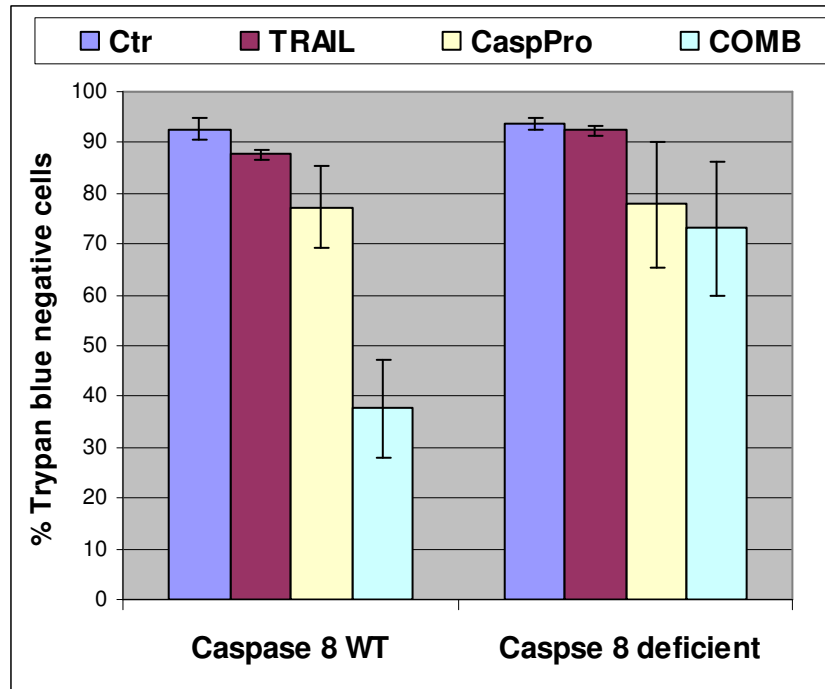

**Supplementary Figure 2. Caspase 8 is required for CaspPro (C2, compound 2) - mediated potentiation of TRAIL-induced cell death**

Caspase 8 WT and caspase 8 deficient Jurkat leukemic cells were treated with 7.5 ng/ml TRAIL, 80  $\mu$ M CaspPro and the combination for 18h in 1% FBS. Viability was measured by Trypan Blue dye exclusion method, using a TC10 Automated Cell Counter (Biorad, USA). The results represent the mean  $\pm$  standard deviations (SDs) of 2 independent experiments, each one with multiple replicates. The results show that caspase 8 is required for CaspPro-mediated sensitization to TRAIL-induced cell death; We have previously confirmed the lack of expression of caspase 8 in caspase 8 deficient Jurkat cell line<sup>8</sup>.
